# Supplementary material
Source: MDPI journal article supplement (https://www.mdpi.com/2313-0105/9/10/482)
Supplement: s1 [file s1]

## Supplementary materials

### **Fe<sub>3</sub>O<sub>4</sub> Nanoparticle-Decorated Bimodal Porous Carbon Nanocomposite Anode for High-Performance Lithium-Ion Batteries**

Juti Rani Deka <sup>1</sup>, Diganta Saikia <sup>2</sup>, Yuan-Hung Lai <sup>2</sup>, Hsien-Ming Kao <sup>2,\*</sup>

and Yung-Chin Yang <sup>1,\*</sup>

<sup>1</sup> Institute of Materials Science and Engineering, National Taipei University of Technology, Taipei 106344, Taiwan; juti.deka@gmail.com

<sup>2</sup> Department of Chemistry, National Central University, Zhongli 320317, Taiwan; digantas@gmail.com (D.S.); s12304777@gmail.com (Y.-H.L.)

\* Correspondence: hmkao@cc.ncu.edu.tw (H.-M.K.); ycyang@ntut.edu.tw (Y.-C.Y.); Tel.: +886-3-4275054 (H.-M.K.); +886-2-27712171 (ext. 2762) (Y.-C.Y.); Fax: +886-3-4227664 (H.-M.K.); +886-2-27317185 (Y.-C.Y.)

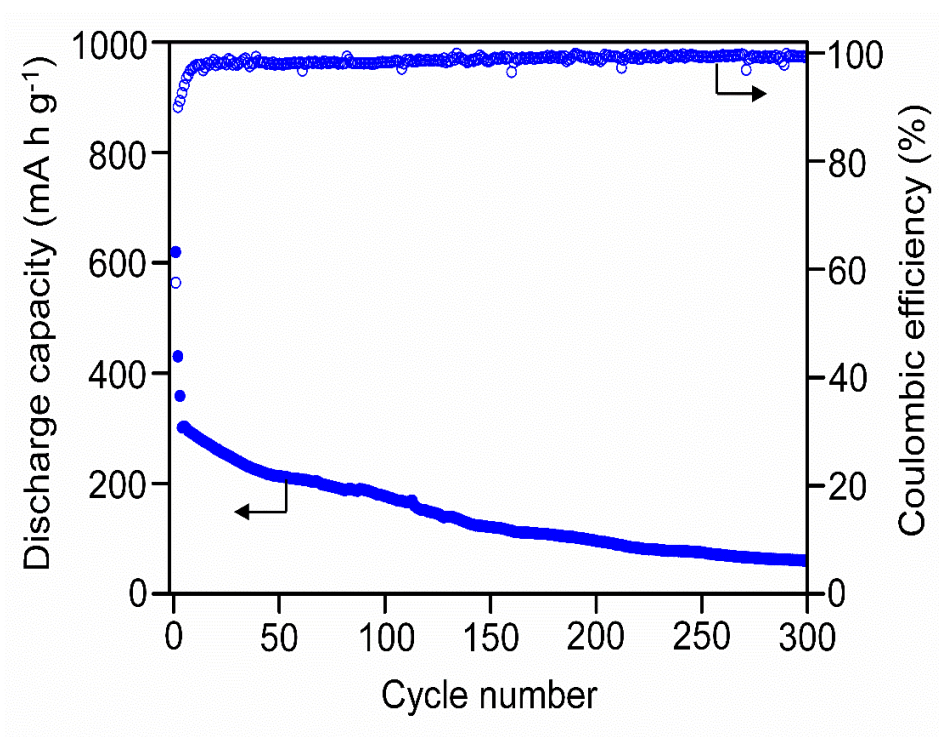

**Figure S1.** Cycle performance of the pristine Fe<sub>3</sub>O<sub>4</sub> nanoparticles at a current density of 1000 mA g<sup>-1</sup>.

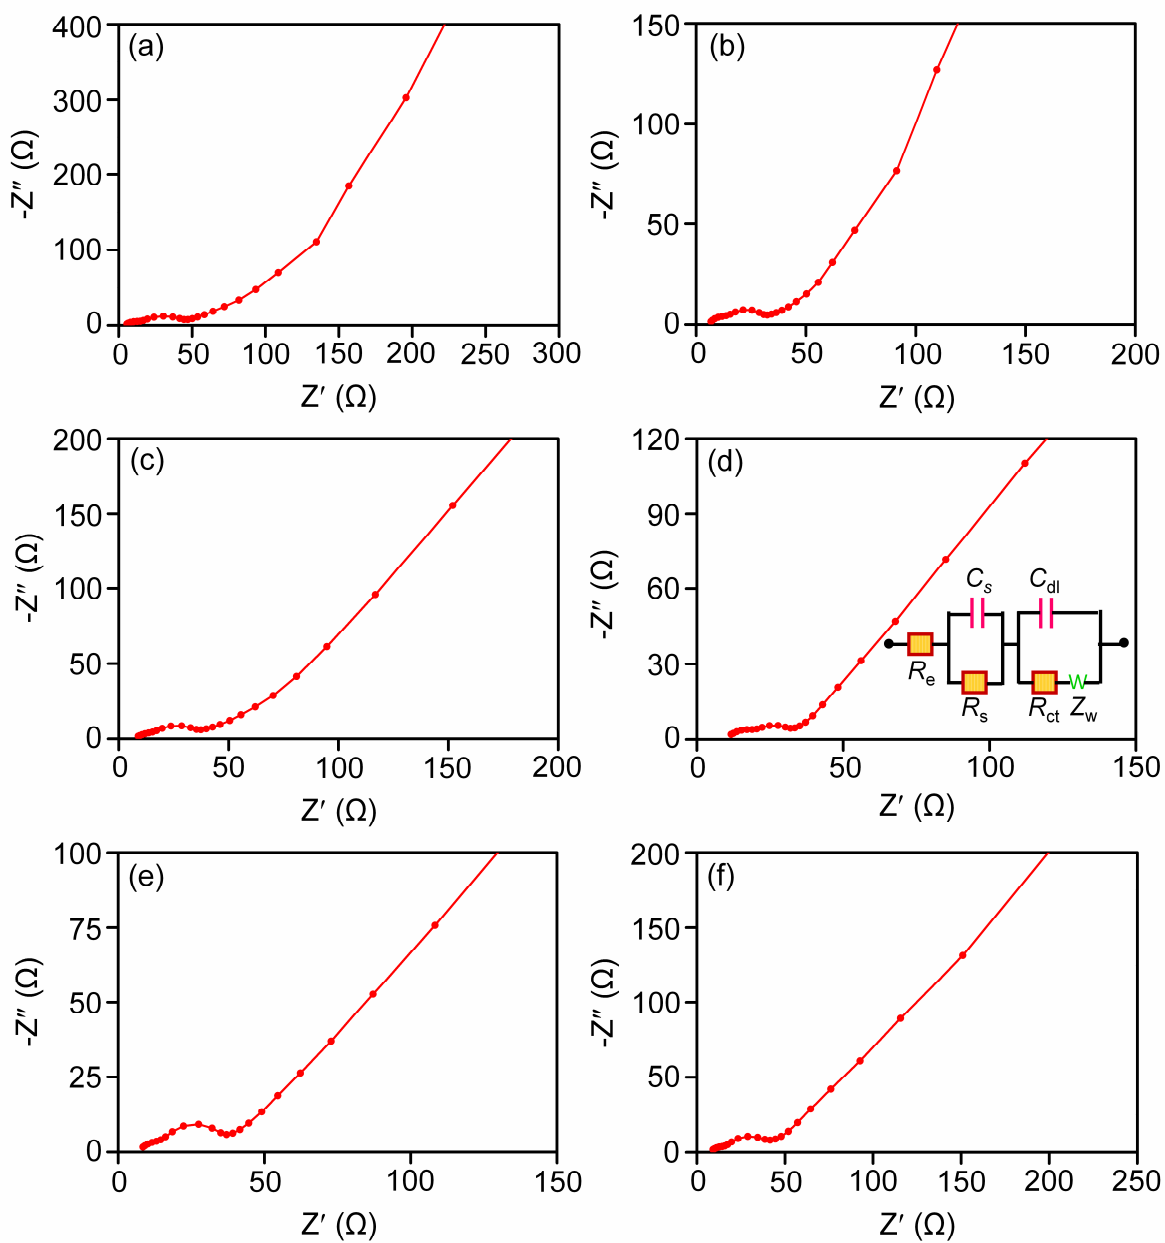

**Figure S2.** EIS spectra of (a) pristine CMK-9, (b)  $\text{Fe}_3\text{O}_4(4)@\text{C9}$ , (c)  $\text{Fe}_3\text{O}_4(8)@\text{C9}$ , (d)  $\text{Fe}_3\text{O}_4(13)@\text{C9}$ , (e)  $\text{Fe}_3\text{O}_4(18)@\text{C9}$  and (f)  $\text{Fe}_3\text{O}_4(25)@\text{C9}$  anodes after 100 cycles.

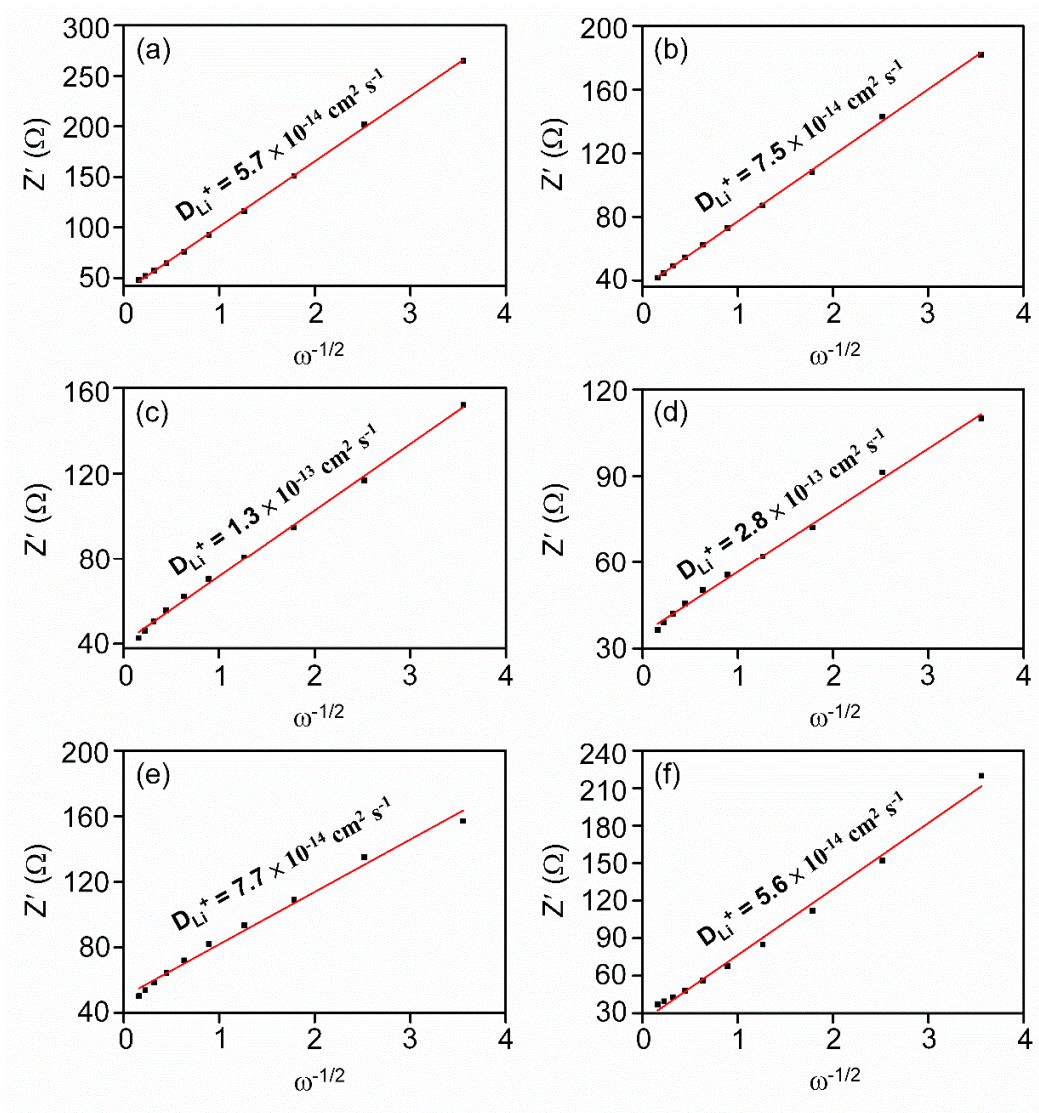

**Figure S3.**  $Z'$  vs.  $\omega^{-1/2}$  plots of (a) pristine CMK-9, (b)  $\text{Fe}_3\text{O}_4(4)@\text{C9}$ , (c)  $\text{Fe}_3\text{O}_4(8)@\text{C9}$ , (d)  $\text{Fe}_3\text{O}_4(13)@\text{C9}$ , (e)  $\text{Fe}_3\text{O}_4(18)@\text{C9}$  and (f)  $\text{Fe}_3\text{O}_4(25)@\text{C9}$  anodes.

**Table S1.** Comparison of electrochemical performance of Fe<sub>3</sub>O<sub>4</sub>(13)@C9 with other similar anode materials reported for lithium-ion batteries.

| Materials                                                           | Capacity<br>(mA h g <sup>-1</sup> ) | Current density<br>(mA g <sup>-1</sup> ) | Cycle<br>number | Reference       |
|---------------------------------------------------------------------|-------------------------------------|------------------------------------------|-----------------|-----------------|
| Fe <sub>3</sub> O <sub>4</sub> /CNTs/rGO                            | 1048                                | 200                                      | 50              | 51              |
| Graphene nanoscroll-<br>wrapped Fe <sub>3</sub> O <sub>4</sub> NPs  | 1010                                | 100                                      | 50              | 53              |
| Fe <sub>3</sub> O <sub>4</sub> /Fe/carbon                           | 600                                 | 50                                       | 40              | 54              |
| MOF-derived<br>MnO-doped Fe <sub>3</sub> O <sub>4</sub> @C          | 520                                 | 1000                                     | 200             | 55              |
| Carbon-wrapped Fe <sub>3</sub> O <sub>4</sub> NP<br>film on Ni foam | 657                                 | 200                                      | 100             | 56              |
| Fe <sub>3</sub> O <sub>4</sub> @rGO                                 | 1296                                | 100                                      | 100             | 20              |
| Fe <sub>3</sub> O <sub>4</sub> @C                                   | 865                                 | 200                                      | 120             | 45              |
|                                                                     | 500                                 | 1000                                     | 500             |                 |
| Fe <sub>3</sub> O <sub>4</sub> @C                                   | 864                                 | 200                                      | 600             | 21              |
|                                                                     | 514                                 | 1000                                     | 600             |                 |
| Fe <sub>3</sub> O <sub>4</sub> /rGO                                 | 700                                 | 881                                      | 100             | 57              |
| Fe <sub>3</sub> O <sub>4</sub> @C@NS-rGO                            | 532                                 | 100                                      | 100             | 10              |
| Fe <sub>3</sub> O <sub>4</sub> /C composite                         | 506                                 | 250                                      | 350             | 13              |
| Fe <sub>3</sub> O <sub>4</sub> @C/Graphene                          | 901                                 | 200                                      | 200             | 19              |
| Fe <sub>3</sub> O <sub>4</sub> @N-HPCNs                             | 1240                                | 100                                      | 100             | 39              |
|                                                                     | 581                                 | 1000                                     | 400             |                 |
| Fe <sub>3</sub> O <sub>4</sub> @C-N                                 | 800                                 | 500                                      | 100             | 58              |
| Fe <sub>3</sub> O <sub>4</sub> @CMK-5                               | 850                                 | 200                                      | 60              | 35              |
| Fe <sub>3</sub> O <sub>4</sub> -CNF electrospinning                 | 687                                 | 100                                      | 50              | 18              |
| Fe <sub>3</sub> O <sub>4</sub> (13)@C9                              | 1222                                | 100                                      | 150             | Present<br>work |
|                                                                     | 636                                 | 1000                                     | 300             |                 |
